# Supplementary material for: Synthesis of Ti4O7/Ti3O5 Dual-Phase Nanofibers with Coherent Interface for Oxygen Reduction Reaction Electrocatalysts
Source: Materials (Basel). 2020 Jul 14;13(14):3142. doi: 10.3390/ma13143142 (PMC7412102; doi:10.3390/ma13143142)
Supplement: Supplementary file 1 [file materials-13-03142-s001.pdf]

# Synthesis of $\text{Ti}_4\text{O}_7/\text{Ti}_3\text{O}_5$ Dual-Phase Nanofibers with Coherent Interface for Oxygen Reduction Reaction Electrocatalysts

Supplementary Materials

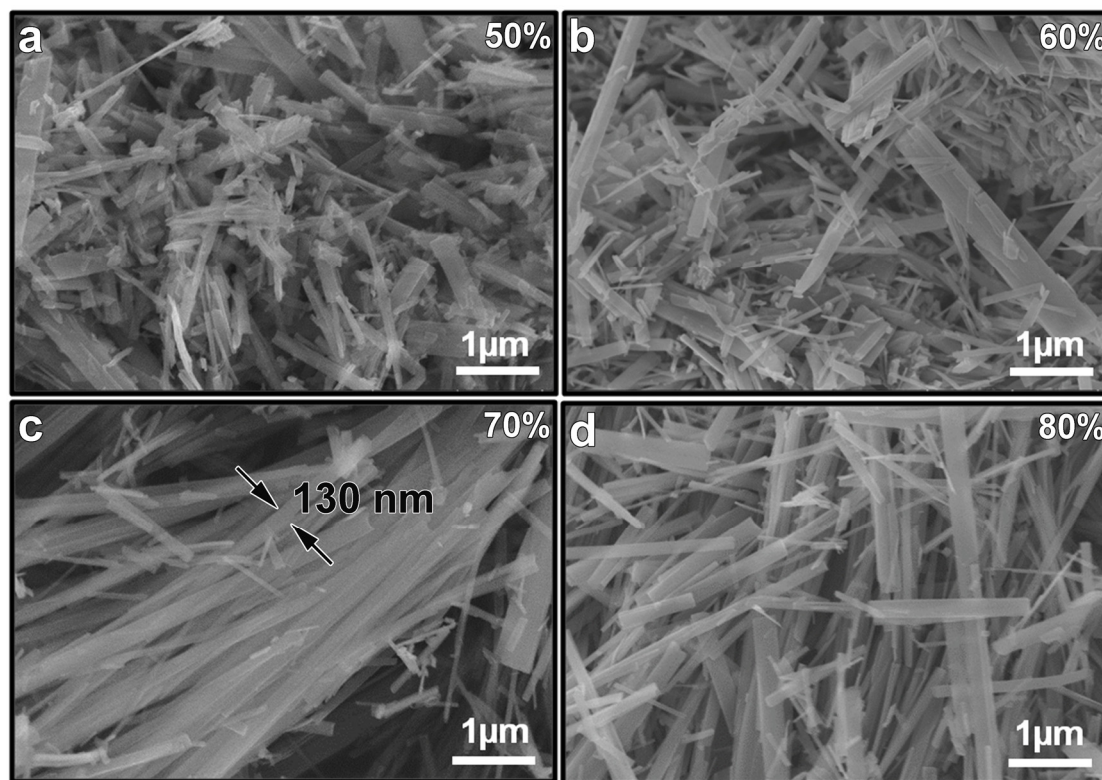

**Figure S1.** SEM images of the obtained  $\text{H}_2\text{Ti}_3\text{O}_7$  nanofibers under different filling amount of the reactor.

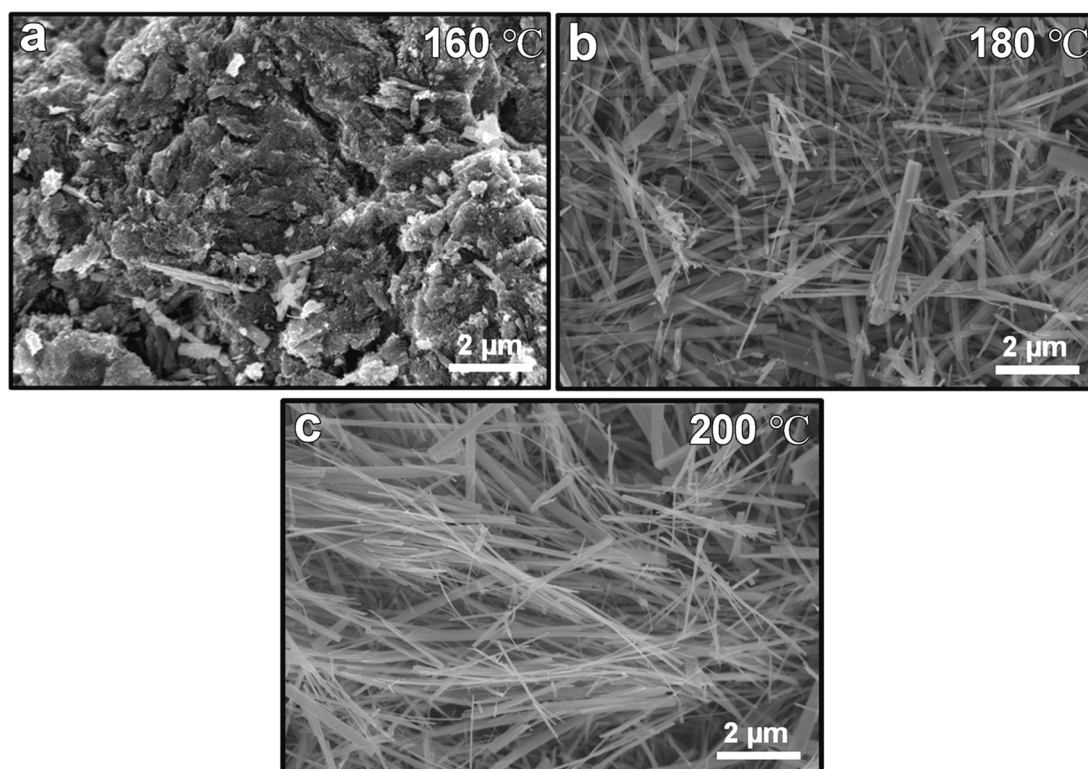

**Figure S2.** SEM images of the  $\text{H}_2\text{Ti}_3\text{O}_7$  nanofibers under different hydrothermal reaction temperatures.

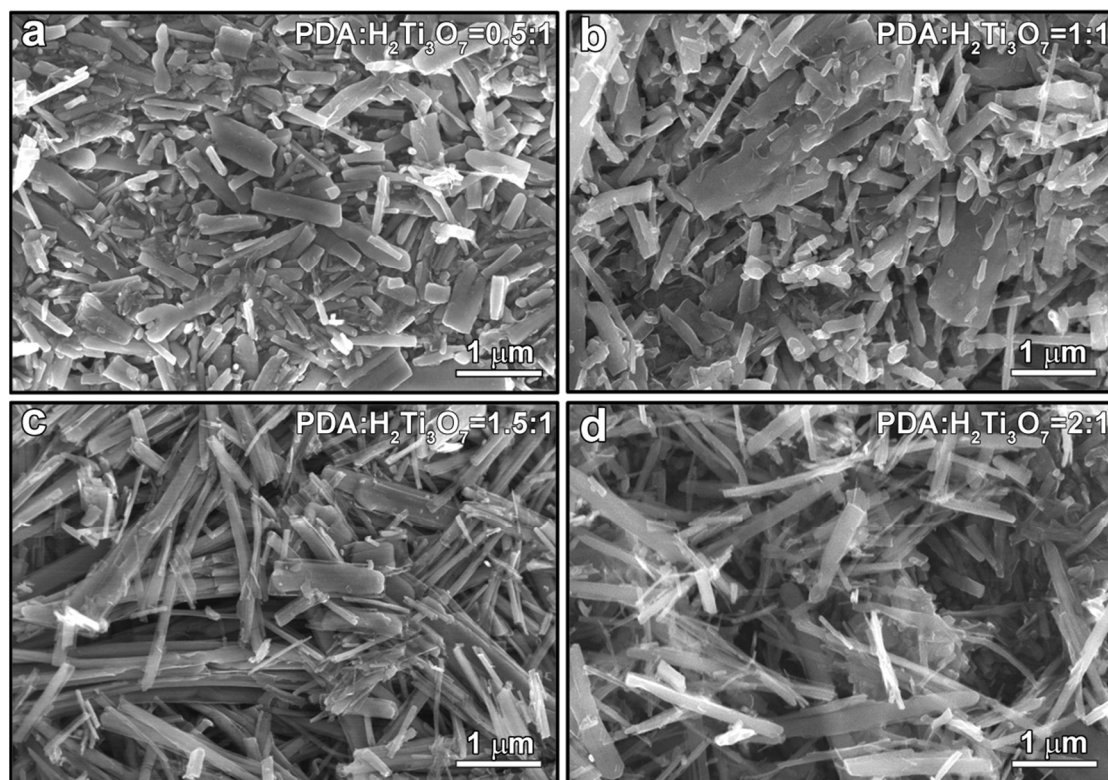

**Figure S3.** SEM images of the obtained  $\text{TiO}_{2n-1}$  nanofibers with different PDA:  $\text{H}_2\text{Ti}_3\text{O}_7$  weight ratio.

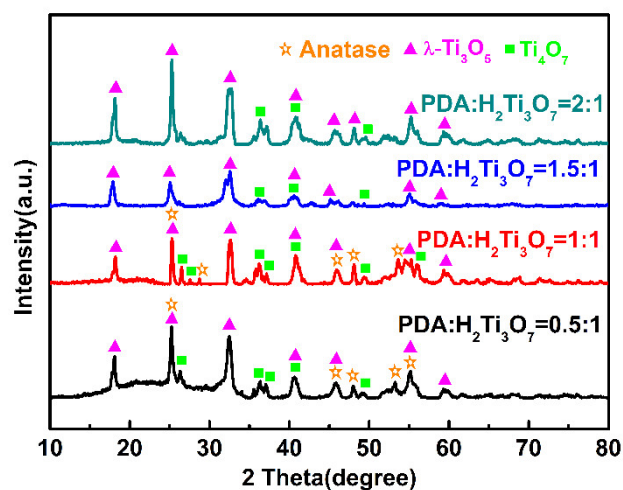

Figure S4. XRD spectra of the  $\text{TiO}_2$  nanofibers with different content of PDA.

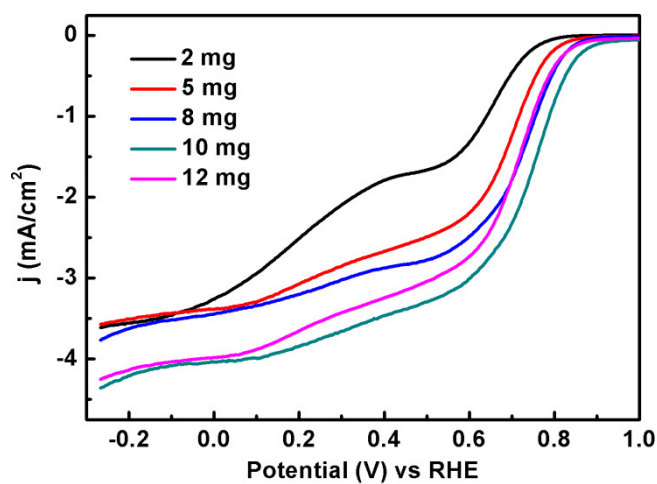

Figure S5. The effect of catalysts loading amount on the ORR performance.

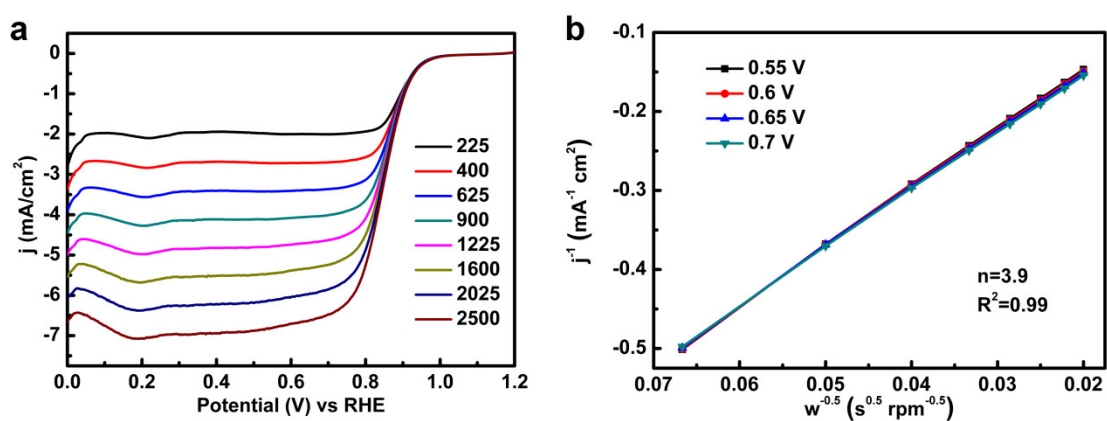

Figure S6. The ORR catalytic performance of 20% commercial Pt/C in 0.1 M KOH solution.

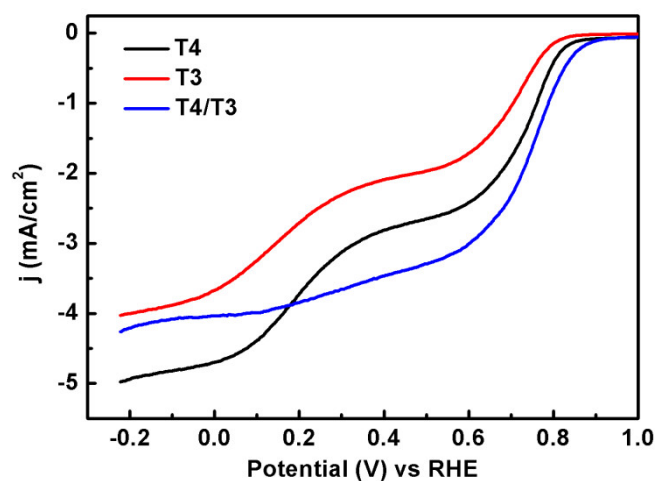

Figure S7. The LSV curves of T4, T3 and T4/T3 catalysts at 1600 rpm.

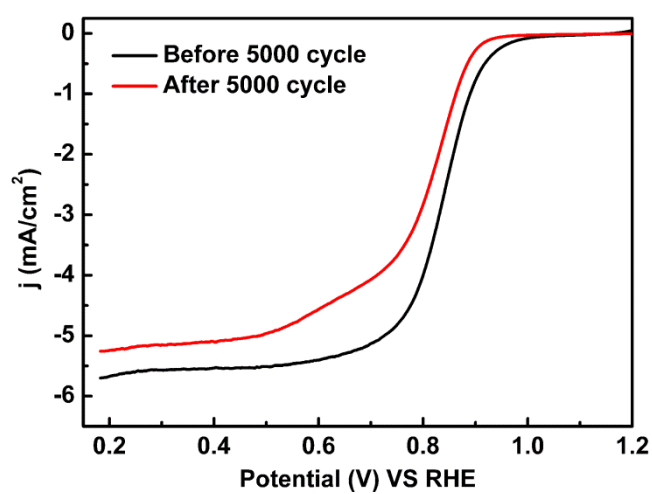

Figure S8. Cycling stability of 20% commercial Pt/C catalysts in 0.1 M KOH solution under 1600 rpm.

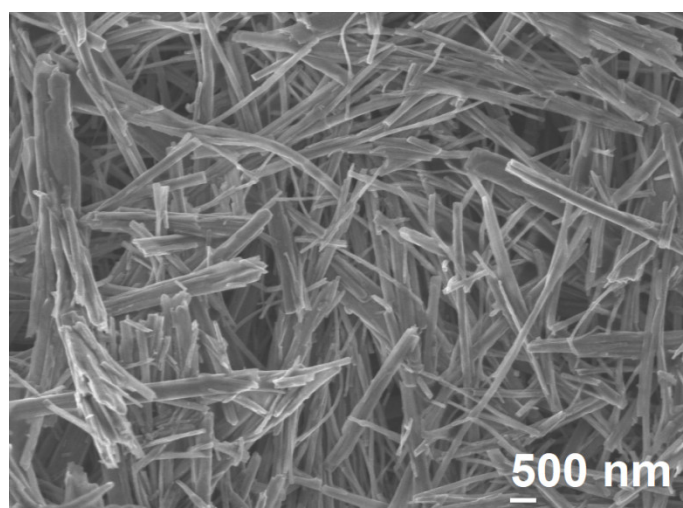

Figure S9. SEM image of T4/T3 nanofibers after the long time working.

**Table S1.** The comparison of ORR performance of some common non-platinum catalysts in alkaline solution.

| Catalysts                        | Media     | Onset Potential<br>(vs. RHE) | Half-wave Potential<br>(vs. RHE) | References |
|----------------------------------|-----------|------------------------------|----------------------------------|------------|
| TiO <sub>2</sub> /N-doped Carbon | 0.1 M KOH | 0.76 V                       | 0.65 V                           | [1]        |
| Co-N-C Nanosheets                |           | 0.72 V                       | 0.90 V                           | [2]        |
| FeNP-C                           |           | 0.90 V                       | 0.72 V                           | [3]        |
| Fe-NHHPC900                      |           | 0.94 V                       | 0.86 V                           | [4]        |
| T4/T3 catalyst                   |           | 0.90 V                       | 0.75 V                           | This work  |

## References

1. Jin, S.; Li, C.; Shrestha, L.K.; Yamauchi, Y.; Ariga, K.; Hill, J.P. Simple fabrication of titanium dioxide/N-doped carbon hybrid material as non-precious metal electrocatalyst for the oxygen reduction reaction. *ACS Appl. Mater. Interfaces* **2017**, *9*, 18782–18789.
2. Lyu, D.; Du, Y.; Huang, S.; Mollamahale, B.Y.; Zhang, X.; Hasan, S.W.; Yu, F.; Wang, S.; Tian, Z.Q.; Shen, P.K. Highly Efficient Multifunctional Co–N–C Electrocatalysts with Synergistic Effects of Co–N Moieties and Co Metallic Nanoparticles Encapsulated in a N-Doped Carbon Matrix for Water-Splitting and Oxygen Redox Reactions. *ACS Appl. Mater. Interfaces* **2019**, *11*, 39809–39819.
3. Hu, Y.; Zhu, J.; Lv, Q.; Liu, C.; Li, Q.; Xing, W. Promotional effect of phosphorus doping on the activity of the Fe-N/C catalyst for the oxygen reduction reaction. *Electrochim. Acta* **2015**, *155*, 335–340.
4. Tian, P.; Wang, Y.; Li, W.; Song, S.; Zhou, S.; Gao, H.; Xu, H.; Tian, X.; Zang, J. A salt induced gelatin crosslinking strategy to prepare Fe-N doped aligned porous carbon for efficient oxygen reduction reaction catalysts and high-performance supercapacitors. *Chin. J. Catal.* **2020**, *382*, 109–120.
